# Supplementary material for: Uncovering Dynamic Brain Reconfiguration in MEG Working Memory n-Back Task Using Topological Data Analysis
Source: MDPI journal article supplement (doi:10.3390/brainsci9060144), 2019-06-19
Supplement: s1 [file s1]

|    | Subject | Mapper0B<br>(Label of<br>the<br>timepoint<br>n<91) | Accuracy 0B(%) | Mean<br>reaction<br>time<br>0B(ms) | Mapper 2B | Accuracy<br>2B(%) | Mean<br>Reaction<br>Time<br>2B(ms) |
|----|---------|----------------------------------------------------|----------------|------------------------------------|-----------|-------------------|------------------------------------|
| 1  | 100307  | 72                                                 | 93             | 725                                | 88        | 77                | 862                                |
| 2  | 102816  | 66                                                 | 99             | 848                                | 89        | 80                | 1120                               |
| 3  | 104012  | 77                                                 | 85             |                                    | 86        |                   |                                    |
| 4  | 105923  | 68                                                 | 93             | 782                                | 86        | 93                | 876                                |
| 5  | 106521  | 57                                                 | 100            | 876                                | 87        | 93                | 1174                               |
| 6  | 108323  | 58                                                 | 56             | 902                                | 86        | 92                | 919                                |
| 7  | 109123  | 72                                                 | 99             | 706                                | 88        | 94                | 958                                |
| 8  | 111514  | 70                                                 | 99             | 704                                | 63        | 98                | 835                                |
| 9  | 112920  | 79                                                 | 97             | 666                                |           | 91                | 937                                |
| 10 | 113923  |                                                    | 94             | 766                                | 80        | 90                | 959                                |
| 11 | 116726  | 63                                                 | 54             | 974                                | 77        | 54                | 1136                               |
| 12 | 125525  | 85                                                 | 65             | 1008                               | 80        | 65                | 900                                |
| 13 | 133019  | 79                                                 | 91             | 678                                | 84        | 86                | 851                                |
| 14 | 140117  | 76                                                 | 85             | 886                                | 75        | 87                | 1102                               |
| 15 | 146129  | 65                                                 | 85             |                                    | 82        |                   |                                    |
| 16 | 149741  | 84                                                 | 91             | 678                                | 83        | 91                | 979                                |
| 17 | 151526  | 81                                                 | 86             | 1051                               | 87        | 78                | 1141                               |
| 18 | 156334  | 62                                                 | 97             | 603                                | 71        | 88                | 743                                |
| 19 | 158136  | 79                                                 | 87             | 787                                | 83        | 52                | 794                                |
| 20 | 162026  | 74                                                 | 97             | 604                                | 82        | 84                | 816                                |
| 21 | 162935  | 69                                                 | 87             | 790                                | 89        | 91                | 1008                               |
| 22 | 164636  | 69                                                 | 94             | 829                                | 63        | 93                | 1006                               |
| 23 | 166438  | 75                                                 | 100            | 642                                | 82        | 88                | 881                                |
| 24 | 172029  | 75                                                 | 95             | 772                                |           | 72                | 1014                               |
| 25 | 175237  | 72                                                 | 100            | 646                                | 85        | 96                | 737                                |
| 26 | 177746  | 67                                                 | 90             | 821                                | 81        | 92                | 1158                               |
| 27 | 175540  | 67                                                 | 91             | 615                                | 84        | 90                | 896                                |
| 28 | 182840  | 68                                                 | 97             | 736                                | 87        | 69                | 1275                               |
| 29 | 185442  | 65                                                 | 96             | 614                                | 78        | 85                | 712                                |
| 30 | 189349  | 60                                                 | 97             | 638                                | 68        | 92                | 904                                |
| 31 | 191033  | 75                                                 | 90             | 861                                | 64        | 85                | 942                                |
| 32 | 191437  | 76                                                 | 93             | 682                                | 76        | 78                | 938                                |
| 33 | 191841  | 89                                                 | 88             | 853                                | 85        | 83                | 1116                               |
| 34 | 192641  | 70                                                 | 86             | 747                                | 87        | 81                | 1000                               |
| 35 | 195041  | 83                                                 | 93             | 630                                | 85        | 96                | 811                                |
| 36 | 198653  |                                                    | 97             | 686                                | 87        | 93                | 754                                |
| 37 | 200109  | 90                                                 | 100            | 559                                | 90        | 98                | 803                                |
| 38 | 204521  | 87                                                 | 85             | 841                                | 90        | 81                | 969                                |
| 39 | 205119  | 85                                                 | 97             | 652                                | 91        | 86                | 1004                               |
| 40 | 212318  | 84                                                 | 86             | 732                                | 78        | 86                | 723                                |
| 41 | 214524  | 72                                                 | 98             | 585                                | 78        | 92                | 614                                |
| 42 | 223929  | 72                                                 | 97             | 689                                | 91        | 96                | 800                                |
| 43 | 248339  | 77                                                 | 86             | 560                                | 83        | 89                | 628                                |
| 44 | 250427  | 88                                                 | 83             | 911                                | 79        | 80                | 992                                |
| 45 | 255639  | 83                                                 | 95             | 759                                | 86        | 82                | 915                                |
| 46 | 257845  | 67                                                 | 97             | 698                                | 84        | 81                | 1059                               |

|    |        |    |     |      |    |     |      |
|----|--------|----|-----|------|----|-----|------|
| 47 | 283543 | 77 | 93  | 748  | 87 | 96  | 947  |
| 48 | 352738 | 59 | 91  | 708  | 69 | 88  | 925  |
| 49 | 353740 | 71 | 100 | 661  | 74 | 94  | 834  |
| 50 | 406836 | 69 | 100 | 507  | 74 | 97  | 611  |
| 51 | 433839 | 73 | 100 | 543  | 70 | 95  | 785  |
| 52 | 500222 | 63 | 100 | 797  | 87 | 88  | 905  |
| 53 | 512835 | 79 | 50  |      | 86 |     |      |
| 54 | 568963 | 65 | 93  | 756  | 76 | 86  | 1014 |
| 55 | 581450 | 84 | 100 | 656  | 83 | 96  | 801  |
| 56 | 599671 | 72 | 81  | 767  | 78 | 88  | 860  |
| 57 | 601127 |    | 88  | 667  | 59 | 94  | 752  |
| 58 | 660951 | 82 | 67  |      | 91 |     |      |
| 59 | 662551 | 84 | 47  |      | 82 |     |      |
| 60 | 665254 | 59 | 90  | 799  | 77 | 87  | 897  |
| 61 | 667056 | 74 | 90  | 772  | 64 | 100 | 875  |
| 62 | 679770 | 70 | 100 | 612  | 84 | 87  | 1001 |
| 63 | 680957 | 61 | 89  | 901  | 75 | 87  | 1073 |
| 64 | 706040 |    | 63  | 1013 | 91 | 74  | 1013 |
| 65 | 707949 | 70 | 68  | 1000 | 82 | 63  | 930  |
| 66 | 715950 |    | 96  | 662  | 73 | 91  | 832  |
| 67 | 725751 | 76 | 96  | 605  | 85 | 93  | 872  |
| 68 | 735148 |    | 85  | 538  | 78 | 74  | 602  |
| 69 | 783463 | 81 | 93  | 751  | 89 | 89  | 914  |
| 70 | 814649 | 73 | 91  | 678  | 75 | 93  | 958  |
| 71 | 825048 | 66 | 75  |      | 67 |     |      |
| 72 | 872764 | 65 | 100 | 742  | 71 | 90  | 969  |
| 73 | 877168 | 83 | 84  | 718  | 84 | 79  | 1089 |
| 74 | 891667 | 66 | 95  | 614  | 82 | 94  | 786  |
| 75 | 898179 | 74 | 93  | 720  | 88 | 85  | 1032 |
| 76 | 912447 | 82 | 83  | 791  | 88 | 69  | 955  |
| 77 | 917255 | 75 | 87  | 785  | 83 | 83  | 925  |
| 78 | 990366 |    | 91  | 623  | 74 | 92  | 703  |
