# Supplementary material for: Uncovering Dynamic Brain Reconfiguration in MEG Working Memory n-Back Task Using Topological Data Analysis
Source: MDPI journal article supplement (doi:10.3390/brainsci9060144), 2019-06-19
Supplement: s1 [file s1]

## **MATLAB code for reading and normalizing**

```
timeseries=[];  
for i=1:length(freqnames)  
    %this loads the data for 107 brain regions and 91 timepoints for one  
    %frequency band  
    dat=ft_read_cifti(['872764_MEG_Wrkmem_srcavgdics_[LM-TIM-2B]_[FB-'  
freqnames{i} '].power.Yeo2011.ptseries.nii]);  
    %combine spatial locations and frequencies in one dimension  
    timeseries=[timeseries; dat.power];  
end
```

## **R code for to obtain and plot Mapper graphs**

```
A <- read.csv(file="data100307_0B.txt")  
#distance function  
eucl <- dist(as.data.frame(t(B)), method = "euclidean")  
  
#filter function  
baseline <- matrix(0, nrow = 1, ncol = 641)  
for(i in 1:30){baseline <- baseline + B[,i]}  
baseline <- baseline/30  
filter <- matrix(0, nrow=1, ncol=91)  
for(i in 1:91){filter[1,i] <- dist(rbind(baseline, B[,i]), method="euclidean")}  
  
#mapper  
B.mapper <- mapper(  
  dist_object = as.matrix(eucl),  
  filter_values = t(filter),  
  num_intervals = 5,  
  percent_overlap = 50,  
  num_bins_when_clustering = 10)  
  
#visualization  
library(igraph)  
for(i in 1:B.mapper$num_vertices){assign(paste0("f",i),  
sort(B.mapper$points_in_vertex[[i]]))}  
gring <- make_ring(91)  
V(gring)$shape <- "none"  
#gringnew <- add_edges(gring,c(36,89,88,91))  
mylist <- vector("list",length = B.mapper.tsne$num_vertices)  
for(i in 1:B.mapper$num_vertices){mylist[[i]]<-get(paste0("f",i))}  
plot(gring, layout = layout.circle, vertex.label.cex=0.7, edge.curved=F,  
edge.color="red",mark.groups=mylist)
```
